# Supplementary material for: Highly active bimetallic phosphide electrocatalysts for hydrogen evolution
Source: Royal Society of Chemistry journal article supplement (doi:10.1039/d3nj00700f), 2023-01-01
Supplement: d3nj00700f1.pdf [file d3nj00700f1.pdf]

## Supporting Information

### Highly Active Bimetallic Phosphides Electrocatalysts for Hydrogen Evolution

Linglan Men<sup>a</sup>, Yu Zhang<sup>a</sup>, Xiao Li<sup>a\*</sup>, Qingqing Pan<sup>a</sup>, Jiao Li<sup>b\*</sup> and Zhongmin Su<sup>ac\*</sup>

<sup>a</sup> School of Chemical and Environmental Engineering, Jilin Provincial Science and Technology Innovation Centre of Optical Materials and Chemistry, Changchun University of Science and Technology, Jilin Provincial International Joint Research Center of Photo-functional Materials and Chemistry, Changchun, 130022, PR China.

<sup>b</sup> School of Materials Science and Engineering, Jilin Jian Zhu University, Changchun, 130018, China

<sup>c</sup> State Key Laboratory of Supramolecular Structure and Materials, Institute of Theoretical Chemistry, College of Chemistry, Jilin University, Changchun 130021, China

### Chemicals and Regents

All of chemicals and reagents were purchased from commercial sources and used as received without further purification.

### Characterization

The phase analysis of the samples was performed by powder X-ray diffraction (PXRD) patterns with the range of 5°-80° via using Siemens D5005 diffractometer with Cu-K $\alpha$  ( $\lambda=1.5418$  Å) radiation. Transmission electron microscopy (TEM) images were measured at JEOL-2100F transmission electron microscope to analyze the microstructures of samples. The interrelated energy dispersive X-ray detector (EDX) spectra

were obtained by using a SU8000 ESEM FEG microscope. X-ray photoelectron spectroscopy (XPS) measurement was collected by the KRATOS Axis ultra with a Mg K $\alpha$  X-ray source. N<sub>2</sub> absorption-desorption isotherms were measured on an ASAP 2020 (Micromeritics, USA). Raman spectra was achieved by JY Labram HR 800.

### **Electrochemical measurements**

All electrochemical measurements were conducted with a conventional three-electrode system through a CHI 760D instrument (shanghai, China) in H<sub>2</sub>SO<sub>4</sub> (0.5 M) and KOH (1.0 M) solution at room temperature. Herin, the glassy carbon electrode (GCE) with diameter of 3 mm was used as working electrode. A carbon rod was used as the counter electrode and Ag/AgCl was used as the reference electrode. Among them, the working electrode preparation process details are as follows: a certain amount of catalyst was dispersed into a mixture which contained 100  $\mu$ L ethanol, 300  $\mu$ L water and 30  $\mu$ L Nafion (5 wt%). Then, the above solution was sonicated for 30 min to form a homogeneous ink. At last, the prepared ink of 5  $\mu$ L was covered by a pipette on the GCE surface and dried naturally at room temperature.

In this work, the catalytic performance of the catalyst was evaluated by linear sweep voltammetry (LSV) with a scan rate of 5 mV s<sup>-1</sup>. Significantly, all overpotential calculations were based on the Nernst equation:  $E_{\text{RHE}} = E_{\text{Ag/AgCl}} + 0.197 + 0.059 * \text{pH}$ . And the Cyclic voltammetry was test

between -0.1V and 0.1V with the scan rate of 100 mV s<sup>-1</sup>. Tafel plots was obtained via the equation of  $\eta = a + \text{blog } |j|$  according to the LSV curves. Electrochemical impedance spectroscopy (EIS) was conducted on the PARSTAT 2273 electrochemical system (Princeton Applied Research Instrumentation, USA) with frequencies from 0.1 to 100000 Hz and an amplitude of 5 mV. The stability was measured by chronoamperometry with *i-t* curves under controlled overpotential for 24 h

## **Experiment section**

### **Synthesis of PPy**

Polypyrrole (PPy) was synthesized according to previous literature [S1]. Pyrrole monomer (Py, 0.16 M) was added to 40 mL of 1 M hydrochloric acid solution, and the above solution was vigorously stirred for 30 min to obtain a uniformly mixed solution. Then 20 mL of ammonium persulfate (APS, 0.04 M) solution was added dropwise to the above mixed solution, followed by static polymerization for 24 h. The obtained product was washed several times with deionized water and ethanol, dried at 60°C and the product was collected.

### **Synthesis of (NH<sub>4</sub>)<sub>12</sub>Na<sub>12</sub>[Mo<sub>40</sub>O<sub>128</sub>]·ca. 70H<sub>2</sub>O**

The polyoxometalate Mo<sub>40</sub> was synthesized by the literature [S2]. 3.00 g of ammonium molybdate (2.4 mmol) was dissolved in 25 mL of water. Then, 0.8 mL of glacial acetic acid (100%) was added to acidify. After that, 0.20 g of sodium dithionite (1.1 mmol) was added, the color of the solution

changes to dark green. 3.00 g of sodium chloride was dispersed in the above solution after stirring 5 min. The resulting solution was aged and crystallized for 4.5 h. Finally, the obtained solution was washed with amounts of 50% (v/v) acetone solution and filtered to obtain a red rhombohedral crystal precipitate, which was dried in air and the product was collected.

### **Synthesis of MoP/MoNiP@NC**

In a typical procedure, 25 mg of Mo<sub>40</sub>, 25 mg of nickel acetate and 100 mg of PPy were dissolved in 25 mL of deionized water and stirred for 10 h to obtain a homogeneous mixed solution. Then, the above solution was heated to boiling until the solvent was evaporated to dryness. Finally, the obtained black powder solid with 0.8 g of sodium hypophosphite in front were calcined at 900 °C under an Ar flow for 2 hours at a heating rate of 5 °C min<sup>-1</sup>. Then, the temperature was naturally cooled to obtain the black electrocatalyst material.

Furthermore, the control samples of MoP@NC, Ni<sub>12</sub>P<sub>5</sub>@NC, and NC were synthesized by the same experimental process without the polyoxometalate Mo<sub>40</sub> and the metal salt nickel acetate.

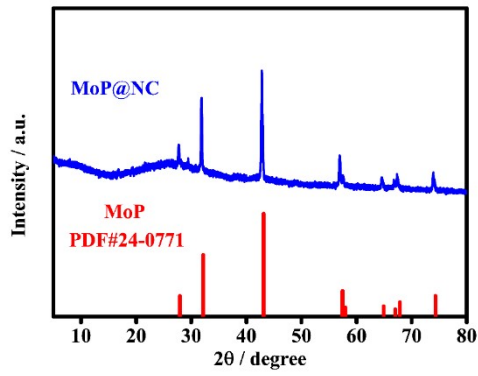

Figure S1. PXRD pattern of MoP@NC.

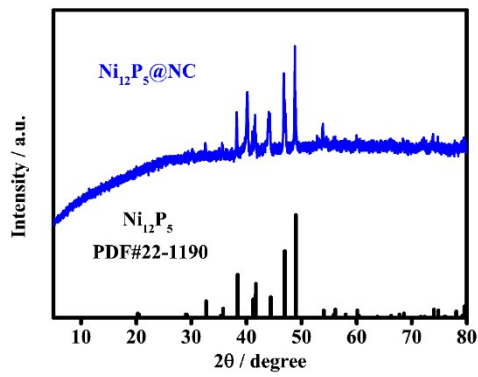

Figure S2. PXRD pattern of Ni<sub>12</sub>P<sub>5</sub>@NC.

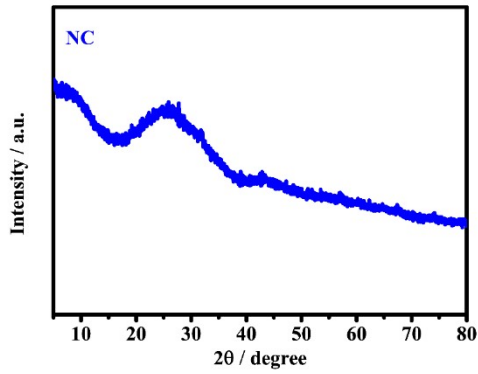

Figure S3. PXRD pattern of NC.

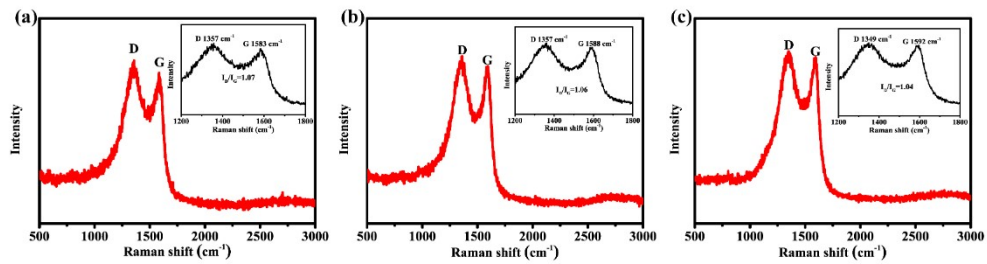

Figure S4. Raman spectrum of (a) MoP/MoNiP@NC, (b) MoNiP@NC and (c) Ni<sub>12</sub>P<sub>5</sub>@NC.

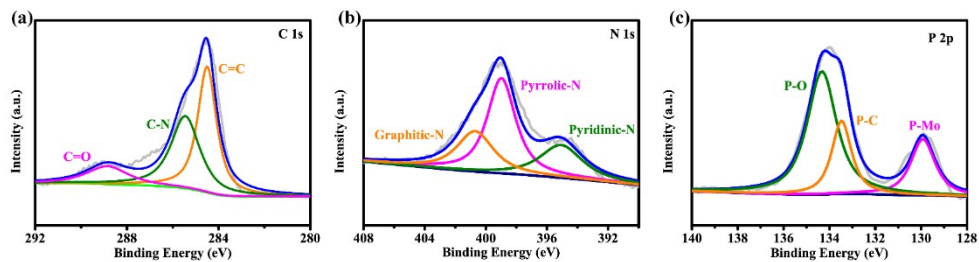

**Figure S5.** XPS spectra of (a) C 1s, (b) N 1s and (c) P 2p of MoP/MoNiP@NC.

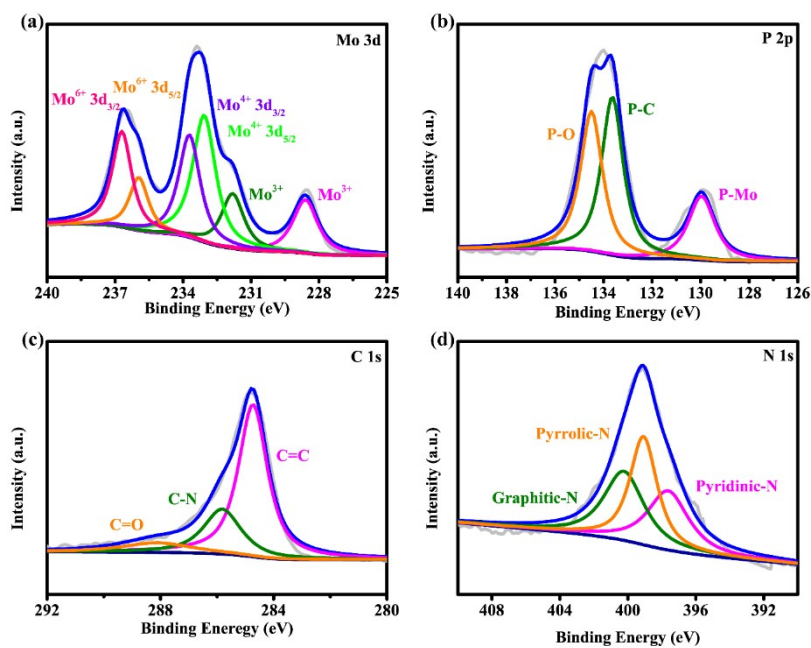

**Figure S6.** XPS spectra of (a) Mo 3d, (b) P 2p, (c) C 1s and (d) N 1s of MoP@NC.

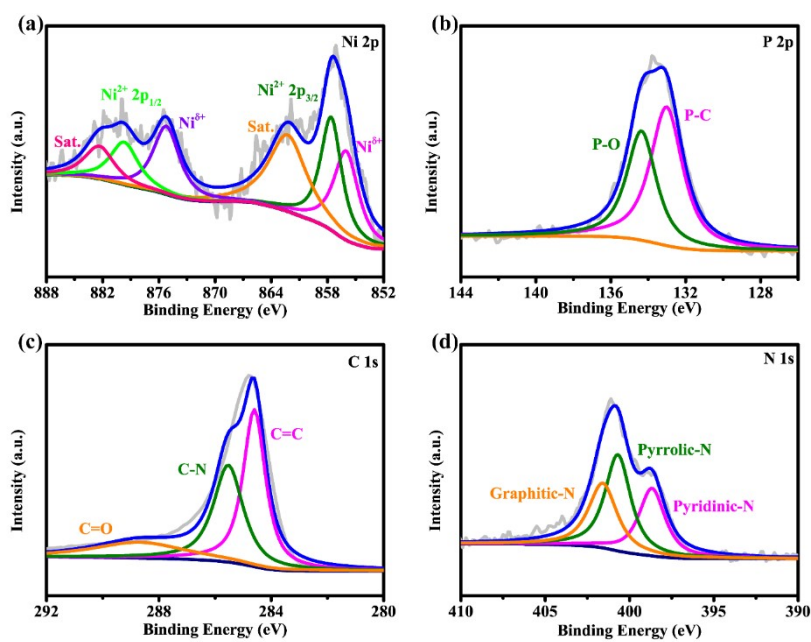

**Figure S7.** XPS spectra of (a) Ni 2p, (b) P 2p, (c) C 1s and (d) N 1s of Ni<sub>12</sub>P<sub>5</sub>@NC.

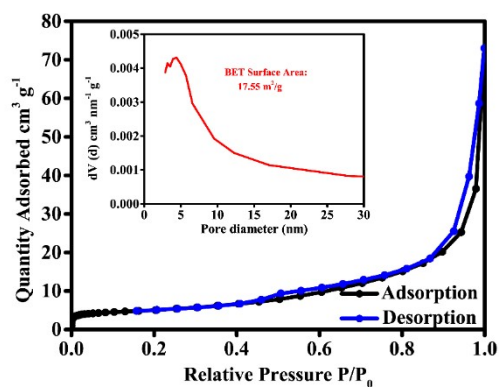

**Figure S8.** N<sub>2</sub> adsorption-desorption isotherms of MoP/MoNiP@NC (Inset: pore diameter distribution diagram).

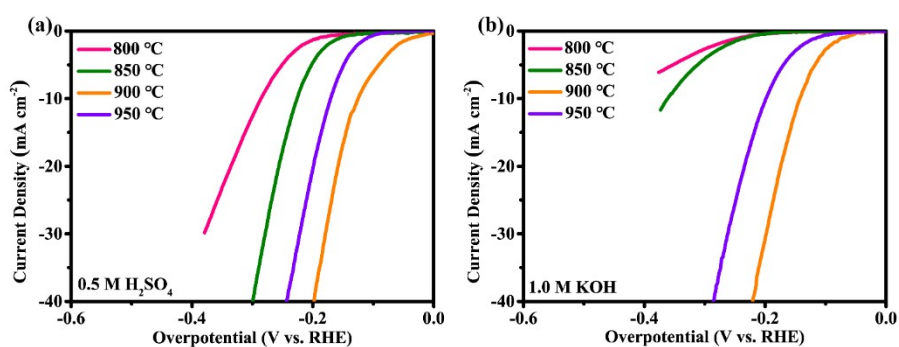

**Figure S9.** HER polarization curves for catalyst with different calcination temperatures (800, 850, 900 and 950 °C) in (a) 0.5 M H<sub>2</sub>SO<sub>4</sub> and (b) 1.0 M KOH.

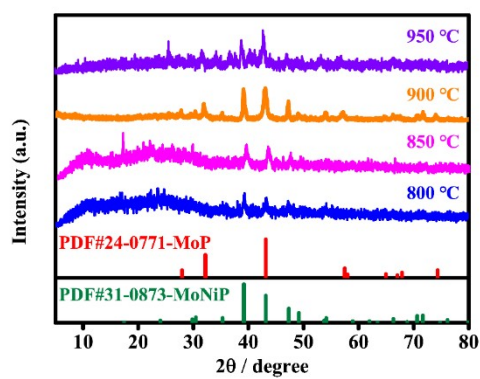

**Figure S10.** PXRD pattern of MoP/MoNiP@NC with different temperatures (800, 850, 900 and 950 °C).

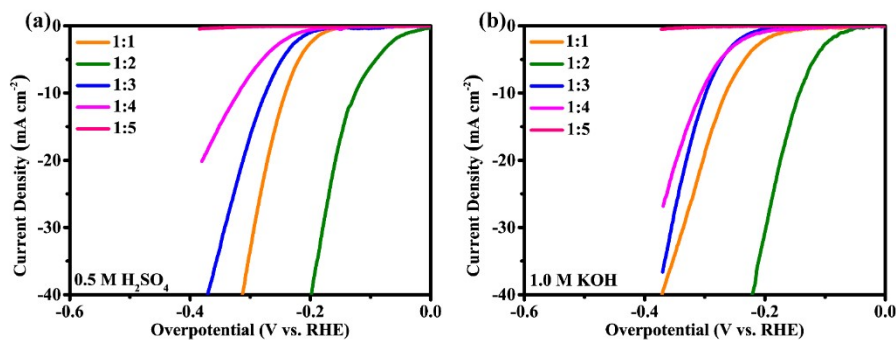

**Figure S11.** HER polarization curves for catalyst with different content of Mo<sub>40</sub> in (a) 0.5 M H<sub>2</sub>SO<sub>4</sub> and (b) 1.0 M KOH. (Note: Calcination temperature: 900 °C, M<sub>Mo40</sub>:M<sub>Ni<sup>2+</sup></sub>=1:1).

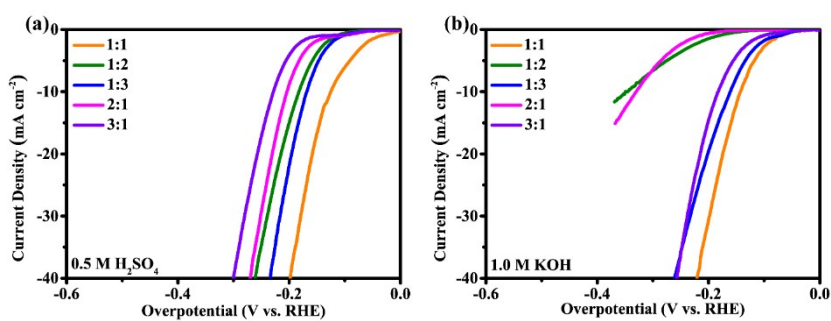

**Figure S12.** HER polarization curves for catalyst with different ratio of nickel ions (a) 0.5 M H<sub>2</sub>SO<sub>4</sub> and (b) 1.0 M KOH. (Note: Calcination temperature: 900 °C, M<sub>metal</sub>:M<sub>ppy</sub>=1:2).

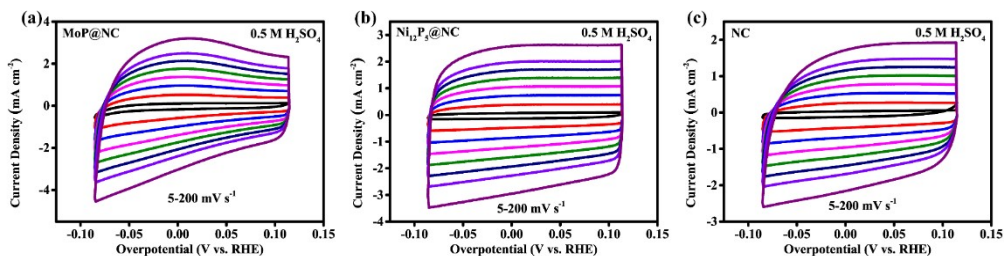

**Figure S13.** CVs of (a) MoP@NC, (b) Ni<sub>12</sub>P<sub>5</sub>@NC, (c) NC with the scan rate ranging from 5 to 200 mV s<sup>-1</sup> in 0.5 M H<sub>2</sub>SO<sub>4</sub>.

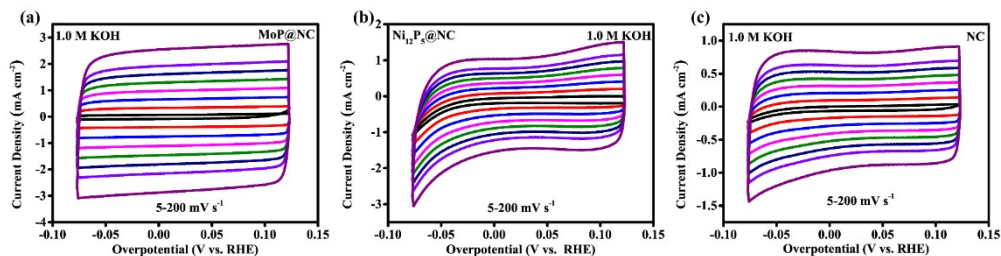

**Figure S14.** CVs of (a) MoP@NC, (b) Ni<sub>12</sub>P<sub>5</sub>@NC, (c) NC with the scan rate ranging from 5 to 200 mV s<sup>-1</sup> in 1.0 M KOH.



**Table S1.** The contents of Mo, Ni and MoP from the inductively coupled plasma (ICP) measurement.

|               | Mo    | Ni   | MoP   |
|---------------|-------|------|-------|
| Content (wt%) | 15.26 | 3.42 | 11.84 |

**Table S2.** HER performance of transitional metal phosphide.

| Catalyst                                    | Electrolyte                              | Overpotential       | Tafel slope             | Stability              | Ref.             |
|---------------------------------------------|------------------------------------------|---------------------|-------------------------|------------------------|------------------|
|                                             |                                          | (mV)<br>$\eta_{10}$ | (mV dec <sup>-1</sup> ) |                        |                  |
| <b>MoP/MoNiP@NC</b>                         | <b>0.5 M H<sub>2</sub>SO<sub>4</sub></b> | <b>125</b>          | <b>115</b>              | <b>24 h</b>            | <b>This work</b> |
|                                             | <b>1.0 M KOH</b>                         | <b>144</b>          | <b>85</b>               | <b>24 h</b>            |                  |
| MoP/NPG                                     | 0.5 M H <sub>2</sub> SO <sub>4</sub>     | 148                 | 49                      | 3000 cycles<br>60 h    | S3               |
|                                             | 1.0 M KOH                                | 126                 | 56                      | 3000 cycles<br>60 h    |                  |
|                                             | 1.0 M PBS                                | 150                 | 102                     | 3000 cycles<br>60 h    |                  |
| MoP@NC                                      | 0.5 M H <sub>2</sub> SO <sub>4</sub>     | 96                  | 49.2                    | 5000 cycles            | S4               |
|                                             | 1.0 M KOH                                | 149                 | 61.7                    | 5000 cycles            |                  |
| C/NiP-C                                     | 1.0 M PBS                                | 191                 | 95.0                    | 5000 cycles            | S5               |
|                                             | 1.0 M KOH                                | 176                 | 100                     | 1000 cycles<br>36000 s |                  |
| MoNiP NWs                                   | 0.5 M H <sub>2</sub> SO <sub>4</sub>     | 179                 | 60                      | 1000 cycles            | S6               |
| MoO <sub>2</sub> /MoS <sub>2</sub> /MoP-800 | 0.5 M H <sub>2</sub> SO <sub>4</sub>     | 135                 | 67                      | 1000 cycles<br>30 h    | S7               |
|                                             | 0.5 M H <sub>2</sub> SO <sub>4</sub>     | 158                 | 58                      | 5000 cycles<br>24 h    |                  |
| MoC-MoP/BCNC<br>NFs                         | 1.0 M KOH                                | 137                 | 65                      | 5000 cycles<br>24 h    | S8               |
|                                             | 0.5 M H <sub>2</sub> SO <sub>4</sub>     | 156                 | 51                      | 1000 cycles            |                  |
| MoP/Fe <sub>2</sub> P/RGO                   | 0.5 M H <sub>2</sub> SO <sub>4</sub>     | 156                 | 51                      | 1000 cycles            | S9               |

|                       |                                      |       |      |                     |     |
|-----------------------|--------------------------------------|-------|------|---------------------|-----|
| N/C/MoP               | 1.0 M KOH                            | 169   | 51.3 | 1000 cycles         | S10 |
| MoP@C@rGO             | 1.0 M H <sub>2</sub> SO <sub>4</sub> | 168.9 | 79   | 17 h                | S11 |
| Mo <sub>2</sub> C-MoP | 0.5 M H <sub>2</sub> SO <sub>4</sub> | 85    | 66   | 5000 cycles<br>16 h | S12 |
| NPC/CFP-800           | 1.0 M KOH                            | 146   | 71   | 5000 cycles<br>16   |     |

## Reference

1. S. Riyazi, M. E. A. Araghi, *J. Mater. Sci-Mater. El.* 2020, **31**, 3539-3548.
2. A. Muller, C. Kuhlmann, H. Bogge, M. Schmidtman, M. Baumann, E. Krickemeyer, *Eur. J. Inorg. Chem.* 2001, **9**, 2271-2277.
3. R.Y. Ge, J.J. Huo, T. Liao, Y. Liu, M.Y. Zhu, J.J. Zhang, W.X. Li, *Appl. Cata. B-Environ.* 2020, **260**, 118196.
4. C.R. Pi, C. Huang, Y.X. Yang, H. Song, X.M. Zhang, Y. Zheng, B. Gao, L.J. Fu, P.K. Chu, K. Huo, *Appl. Cata. B-Environ.* 2020, **263**, 118358.
5. F.X. Wang, Y.M. Liu, C.Y. Zhang, *New. J. Chem.* 2019, **43**, 4160-4167.
6. L. Yang, R. X. Li, Q.X. Wang, M.Y. Chen, X.Q. Yuan, *Chem. Phys. Lett.* 2020, **749**, 137438.
7. L.C. Huang, Y. Yang, C.X. Zhang, H. Yu, T.T. Wang, X.T. Dong, D. Li, Z.L. Liu, 2020, *Nanotechnology*, **31**, 225403.
8. N.N. Chen, Q.J. Mo, L.Q. He, X.Q. Huang, L.C. Yang, J.C. Zeng, Q.S. Gao, 2019, *Electrochim. Acta*, **299**, 708-716.
9. K.W. Wang, J.S. Tan, Z.J. Lu, S. Chen, X.L. She, H.W. Zhang, D.J. Yang, *Int. J. Hydrogen. Energ.* 2018, **43**, 13939-13945.
10. C. Wang, W. Li, X.D. Wang, N. Yu, H.X. Sun, B.Y. Geng, *Open Nano. Res.* 2022, **15**, 1824-1830.
11. Y.F. Zhang, J. Yang, Q.C. Dong, H.B. Geng, Y. Zheng, Y.L. Liu, W.J. Wang, C.C. Li, X.C. Dong, *ACS Appl. Mater. Inter.* 2018, **10**, 26258-26263.
12. T.T. Liu, H. Liu, X.J. Wu, Y.L. Niu, B.M. Feng, W. Li, W.H. Hu, C.M. Li, *Electrochim. Acta.* 2018, **281**, 710-716.
